# Supplementary material for: Field method for preservation of total mercury in waters, including those associated with artisanal scale gold mining
Source: Royal Society of Chemistry journal article supplement (doi:10.1039/d3ay02216a), 2024-01-01
Supplement: d3ay02216a1.pdf [file d3ay02216a1.pdf]

## Supplementary information

### Synthetic matrix recipe

A synthetic matrix was used throughout developmental experiments, to take into consideration the ionic characteristics of natural water samples. This matrix was created following Smith et al. (2002), and ionic concentrations are shown in Supplementary Table 1 alongside major ion chemistry from experimental data at ASGM sites in Kenya (Ondayo et al 2023).

Supplementary Table 1: Comparison of major ion chemistry in a synthetic hardwater recipe (Smith et al (2002))<sup>35</sup>, and measured concentrations from ASGM sites in Kakamega gold belt, Kenya (Ondayo et al (2023))<sup>12</sup>

| <b>Ion</b> | <b>Synthetic matrix (mg/L)<br/>(Smith et al. (2002))<sup>35</sup></b> | <b>Natural water (mg/L)<br/>(Ondayo et al. (2023))<sup>12</sup></b> |
|------------|-----------------------------------------------------------------------|---------------------------------------------------------------------|
| Sodium     | 5.748                                                                 | 7.72                                                                |
| Magnesium  | 1.458                                                                 | 6.64                                                                |
| Calcium    | 10.621                                                                | 12.5                                                                |
| Potassium  | 0.977                                                                 | 1.87                                                                |
| Chloride   | 9.926                                                                 | 2.98                                                                |
| Carbonate  | 23.491                                                                | 73.5                                                                |
| Sulphate   | 11.046                                                                | 9.39                                                                |

Supplementary Table 2: ICP-MS parameters and conditions used in experimental analysis

| <b>Parameter</b>        | <b>Value</b>                         |
|-------------------------|--------------------------------------|
| ICP-MS                  | Agilent 8900                         |
| Nebulizer               | MicroMist 100µm                      |
| Isotope                 | <sup>201</sup> Hg, <sup>202</sup> Hg |
| RF Power                | 1550W                                |
| Replicates              | 3                                    |
| Plasma gas flow rate    | 15 L min <sup>-1</sup>               |
| Auxiliary gas flow rate | 0.9 L min <sup>-1</sup>              |
| Nebulizer gas flow rate | 1.00 L min <sup>-1</sup>             |
| Makeup Gas              | 0.2 L min <sup>-1</sup>              |
| Dwell time              | 100 ms                               |

Supplementary Table 3: Measurements of a blank solution applied to the developed method to calculate a method detection limit ( $3\sigma$ )

| <b>Number<br/>(n=10)</b> | <b>Measurement<br/>(<math>\mu\text{g L}^{-1} \text{Hg}</math>)</b> |
|--------------------------|--------------------------------------------------------------------|
| 1                        | -0.001                                                             |
| 2                        | 0.004                                                              |
| 3                        | -0.003                                                             |
| 4                        | 0.002                                                              |
| 5                        | 0.001                                                              |
| 6                        | 0.002                                                              |
| 7                        | 0.000                                                              |
| 8                        | 0.004                                                              |
| 9                        | 0.005                                                              |
| 10                       | 0.006                                                              |
| LoD ( $3\sigma$ )        | 0.008                                                              |

Supplementary Table 4: Water geochemistry of samples from ASGM sites across Kakamega gold belt (Bushiangala, Lunyerere, Malinya, Rosterman, and Viyalo mine sites)

| Sample | Location    | Field pH | Field Conductivity<br>$\mu\text{S cm}^{-1}$ | Conductivity<br>$\mu\text{S cm}^{-1}$ | pH   | Hg<br>$\mu\text{g L}^{-1}$ | Ca<br>$\text{mg l}^{-1}$ | Mg<br>$\text{mg l}^{-1}$ | Na<br>$\text{mg l}^{-1}$ | K<br>$\text{mg l}^{-1}$ | Total Alk<br>$\text{mg l}^{-1} \text{HCO}_3^-$ | Cl <sup>-</sup><br>$\text{mg l}^{-1}$ | SO <sub>4</sub> <sup>2-</sup><br>$\text{mg l}^{-1}$ | NO <sub>3</sub> <sup>-</sup><br>$\text{mg l}^{-1}$ |
|--------|-------------|----------|---------------------------------------------|---------------------------------------|------|----------------------------|--------------------------|--------------------------|--------------------------|-------------------------|------------------------------------------------|---------------------------------------|-----------------------------------------------------|----------------------------------------------------|
| M1     | Lunyerere   | 7.50     | 370                                         | 434                                   | 8.01 | 0.179                      | 28.9                     | 5.79                     | 37.5                     | 5.01                    | 115                                            | 11.2                                  | 44.0                                                | 70.8                                               |
| M2     | Malinya     | 6.00     | 160                                         | 207                                   | 7.77 | 0.255                      | 17.0                     | 9.09                     | 8.4                      | 2.12                    | 112                                            | 5.11                                  | 2.51                                                | 11.4                                               |
| M3     | Bushiangala | 6.20     | 60                                          | 68.7                                  | 7.08 | 0.348                      | 5.2                      | 2.18                     | 2.4                      | 1.70                    | 38.8                                           | 1.59                                  | 0.786                                               | 4.52                                               |
| M4     | Bushiangala | 6.20     | 30                                          | 79.2                                  | 7.29 | 0.041                      | 7.4                      | 2.94                     | 2.1                      | 1.39                    | 43.9                                           | 0.823                                 | 1.09                                                | 7.55                                               |
| M5     | Rosterman   | 6.60     | 220                                         | 280                                   | 8.12 | 0.045                      | 27.4                     | 13.1                     | 7.5                      | 1.17                    | 164                                            | 6.97                                  | 6.25                                                | 4.04                                               |
| R1     | Lunyerere   | 6.30     | 80                                          | 101                                   | 7.35 | 0.166                      | 7.5                      | 2.90                     | 5.0                      | 1.74                    | 36.2                                           | 4.22                                  | 2.56                                                | 17.7                                               |
| R2     | Lunyerere   | 6.20     | 30                                          | 101                                   | 7.06 | 0.148                      | 7.8                      | 2.91                     | 5.1                      | 1.68                    | 36.0                                           | 4.22                                  | 2.85                                                | 18.1                                               |
| R3     | Malinya     | 6.60     | 110                                         | 143                                   | 7.72 | 0.023                      | 10.9                     | 6.20                     | 8.0                      | 1.30                    | 77.6                                           | 5.28                                  | 1.08                                                | 7.44                                               |
| R4     | Bushiangala | 5.80     | 50                                          | 70.9                                  | 7.08 | 0.084                      | 7.2                      | 2.12                     | 2.2                      | 0.80                    | 39.7                                           | 1.12                                  | 1.33                                                | 5.51                                               |
| R5     | Rosterman   | 6.80     | 160                                         | 207                                   | 7.98 | 0.020                      | 14.3                     | 14.0                     | 5.3                      | 1.57                    | 132                                            | 3.51                                  | 0.725                                               | 0.865                                              |
| R6     | Rosterman   | 6.90     | 150                                         | 211                                   | 7.96 | 0.032                      | 15.4                     | 13.1                     | 5.3                      | 1.72                    | 134                                            | 3.60                                  | 0.796                                               | 0.951                                              |
| R7     | Rosterman   | 7.00     | 100                                         | 138                                   | 7.65 | 0.141                      | 10.3                     | 4.89                     | 7.8                      | 1.24                    | 69.4                                           | 5.13                                  | 1.71                                                | 7.71                                               |
| R8     | Rosterman   | 7.00     | 110                                         | 154                                   | 7.77 | 0.028                      | 11.3                     | 6.64                     | 7.4                      | 1.35                    | 83.0                                           | 4.78                                  | 1.56                                                | 6.34                                               |
| S1     | Lunyerere   | 5.40     | 70                                          | 95.0                                  | 6.75 | 0.132                      | 7.0                      | 2.90                     | 4.4                      | 1.79                    | 28.4                                           | 4.64                                  | 2.34                                                | 19.7                                               |
| S2     | Viyalo      | 6.70     | 260                                         | 332                                   | 7.54 | 0.079                      | 36.0                     | 6.99                     | 10.0                     | 6.32                    | 31.2                                           | 7.66                                  | 86.4                                                | 11.3                                               |
| S3     | Viyalo      | 5.40     | 70                                          | 94.3                                  | 7.66 | 0.043                      | 5.4                      | 3.84                     | 4.2                      | 1.55                    | 31.4                                           | 3.22                                  | 2.12                                                | 22.6                                               |
| S4     | Bushiangala | 5.50     | 60                                          | 85.9                                  | 7.27 | 0.036                      | 9.5                      | 2.63                     | 2.3                      | 0.69                    | 49.8                                           | 0.835                                 | 1.07                                                | 5.89                                               |
| S5     | Rosterman   | 6.10     | 160                                         | 209                                   | 7.80 | 0.055                      | 14.4                     | 12.2                     | 7.7                      | 0.84                    | 120                                            | 3.70                                  | 1.57                                                | 9.07                                               |
| S6     | Rosterman   | 6.60     | 150                                         | 203                                   | 7.97 | 0.010                      | 14.0                     | 13.5                     | 5.1                      | 1.54                    | 129                                            | 3.52                                  | 0.717                                               | 0.861                                              |
| S7     | Rosterman   | 6.70     | 150                                         | 204                                   | 8.03 | 0.043                      | 14.3                     | 13.4                     | 5.2                      | 1.72                    | 128                                            | 3.56                                  | 0.874                                               | 1.02                                               |
| O1     | Lunyerere   | 7.70     | 240                                         | 299                                   | 7.96 | 0.151                      | 26.6                     | 7.89                     | 15.7                     | 4.06                    | 94.2                                           | 9.92                                  | 44.8                                                | 17.3                                               |
| O2     | Malinya     | 7.00     | 190                                         | 229                                   | 7.93 | 0.030                      | 17.7                     | 8.38                     | 11.6                     | 3.93                    | 109                                            | 10.4                                  | 12.2                                                | 4.35                                               |
| O3     | Malinya     | 6.70     | 60                                          | 86.5                                  | 6.52 | 0.046                      | 4.3                      | 1.95                     | 5.8                      | 2.03                    | 15.8                                           | 11.6                                  | 6.53                                                | 5.80                                               |
| O4     | Bushiangala | 6.70     | 140                                         | 175                                   | 6.99 | 0.162                      | 14.2                     | 1.68                     | 9.4                      | 7.76                    | 30.3                                           | 8.79                                  | 27.9                                                | 19.1                                               |

|    |             |      |     |      |      |       |      |      |      |      |      |      |       |       |
|----|-------------|------|-----|------|------|-------|------|------|------|------|------|------|-------|-------|
| O5 | Bushiangala | 6.20 | 70  | 94.7 | 7.24 | 0.102 | 5.4  | 2.59 | 5.4  | 5.80 | 53.8 | 1.21 | 1.42  | 5.83  |
| O6 | Rosterman   | 6.70 | 270 | 349  | 7.93 | 0.277 | 29.4 | 10.4 | 15.9 | 8.88 | 119  | 19.6 | 45.3  | 1.29  |
| O7 | Rosterman   | 6.50 | 270 | 351  | 7.92 | 0.162 | 29.0 | 10.3 | 15.6 | 8.58 | 119  | 19.6 | 45.0  | 1.30  |
| O8 | Rosterman   | 6.60 | 180 | 232  | 7.87 | 0.032 | 23.6 | 6.91 | 6.7  | 4.84 | 113  | 7.47 | 14.2  | 2.94  |
| O9 | Rosterman   | 7.10 | 150 | 209  | 8.00 | 0.058 | 14.6 | 13.6 | 5.2  | 1.61 | 132  | 3.57 | 0.750 | 0.952 |
